# Supplementary material for: Clinical Utility and Validation of the Krakow DCM Risk Score—A Prognostic Model Dedicated to Dilated Cardiomyopathy
Source: MDPI journal article supplement (doi:10.3390/jpm12020236), 2022-02-08
Supplement: s1 [file s1]

**Table S1.** Comparison of output and validation cohorts.

| Parameters                        | Derivation cohort<br>(n=406) | Validation cohort<br>(n=333) | p-value |
|-----------------------------------|------------------------------|------------------------------|---------|
| <b>Clinical parameters</b>        |                              |                              |         |
| Age [years]                       | 53.62 ± 13.64                | 49.88 ± 10.71                | <0.0001 |
| Male [n (%)]                      | 330 (81.3%)                  | 264 (79.3%)                  | 0.50    |
| Symptoms duration [months]        | 40.13 ± 58.31                | 8.84 ± 15.84                 | <0.0001 |
| BMI [kg/m <sup>2</sup> ]          | 27.66 ± 5.11                 | 29.41 ± 15.01                | 0.04    |
| NYHA class                        | 2.51 ± 0.89                  | 2.23 ± 0.77                  | <0.0001 |
| NYHA III/IV                       | 194 (47.8%)                  | 243 (73%)                    | <0.0001 |
| Diabetes mellitus [n (%)]         | 90 (22.2%)                   | 64 (19.2%)                   | 0.33    |
| Prior stroke [n (%)]              | 24 (5.9%)                    | 13 (3.9%)                    | 0.21    |
| Liver diseases [n (%)]            | 53 (13%)                     | 47 (14.1%)                   | 0.68    |
| Dyslipidemia [n (%)]              | 274 (67.5%)                  | 262 (78.7%)                  | 0.0007  |
| COPD [n (%)]                      | 27 (6.7%)                    | 19 (5.7%)                    | 0.60    |
| Atrial fibrillation [n (%)]       | 129 (31.8%)                  | 101 (30.3%)                  | 0.67    |
| <b>ECG findings</b>               |                              |                              |         |
| HR [bpm]                          | 81.02 ± 20.3                 | 76.5 ± 16.62                 | 0.007   |
| LBBB [n (%)]                      | 105 (25.9%)                  | 75 (22.5%)                   | 0.29    |
| VT [0/1]                          | 106 (26.2%)                  | 89 (26.6%)                   | 0.89    |
| <b>Echocardiographic findings</b> |                              |                              |         |
| LVEF [%]                          | 26.1 ± 9.37                  | 27.02 ± 9.96                 | 0.19    |
| LVEDd [mm]                        | 66.18 ± 10.39                | 65.08 ± 8.89                 | 0.25    |
| IVS [mm]                          | 10.35 ± 2.18                 | 10 ± 1.98                    | 0.11    |
| LAA [cm <sup>2</sup> ]            | 29.42 ± 8.42                 | 28.97 ± 8.33                 | 0.45    |
| RAA [cm <sup>2</sup> ]            | 23.13 ± 8.2                  | 22.2 ± 7.89                  | 0.13    |
| MR moderate/severe [n (%)]        | 192 (47.3%)                  | 114 (34.2%)                  | 0.0003  |
| TR moderate/severe [n (%)]        | 105 (25.9%)                  | 66 (19.8%)                   | 0.05    |
| <b>Laboratory results</b>         |                              |                              |         |
| Hb [g/dl]                         | 14.27 ± 1.59                 | 14.55 ± 1.66                 | 0.003   |
| eGFR [ml/min/1.73m <sup>2</sup> ] | 80.01 ± 21.48                | 83.5 ± 20.9                  | 0.01    |
| NT-proBNP [pg/ml]                 | 3662.8 ± 7616.6              | 2759.3 ± 3639.6              | 0.03    |
| LDL [mmol/l]                      | 2.95 ± 0.98                  | 2.99 ± 0.98                  | 0.51    |
| <b>HF therapy</b>                 |                              |                              |         |
| BB [n (%)]                        | 394 (97%)                    | 321 (96.4%)                  | 0.62    |
| ACEi/ARB/ARNI [n (%)]             | 370 (91.1%)                  | 294 (88.3%)                  | 0.20    |
| MRA [n (%)]                       | 357 (87.9%)                  | 289 (86.8%)                  | 0.64    |
| Furosemide [mg/d]                 | 6.38 ± 19.6                  | 6.26 ± 12.02                 | <0.0001 |
| Loop diuretics [mg/d]             | 0.09 ± 0.28                  | 0.16 ± 0.37                  | <0.0001 |
| CRT [n (%)]                       | 13 (3.2%)                    | 11 (3.3%)                    | 0.93    |
| ICD [n (%)]                       | 39 (9.6%)                    | 30 (9%)                      | 0.78    |
| FU [months]                       | 48.21 ± 31.97                | 41.63 ± 29.27                | 0.01    |
| Deaths [n (%)]                    | 70 (17.2%)                   | 50 (14.9%)                   | 0.39    |

Abbreviations: see Table 1.

**Table S2.** Comparison of the baseline characteristics of patients with high, and non-high, mortality risks calculated as the 2-year mortality risk according to the Krakow DCM Risk Score > or ≤ 6%.

| Parameters                 | Q1-Q3<br>(n=529) | Q4<br>(n=176) | p-value |
|----------------------------|------------------|---------------|---------|
| <b>Clinical parameters</b> |                  |               |         |

|                                   |                   |                    |                   |
|-----------------------------------|-------------------|--------------------|-------------------|
| Age [years]                       | 51.31 ± 12.36     | 53.07 ± 13.46      | <b>0.04</b>       |
| Male [n (%)]                      | 425 (80.34%)      | 143 (81.25%)       | 0.78              |
| Symptoms' duration [months]       | 21.18 ± 36.83     | 43.19 ± 68.21      | <b>&lt;0.0001</b> |
| BMI [kg/m <sup>2</sup> ]          | 28.95 ± 12.23     | 26.72 ± 5.21       | <b>0.0004</b>     |
| NYHA class                        | 2.23 ± 0.78       | 2.85 ± 0.88        | <b>&lt;0.0001</b> |
| NYHA III/IV                       | 183 (34.59%)      | 106 (60.23%)       | <b>&lt;0.0001</b> |
| Diabetes mellitus [n (%)]         | 89 (16.82%)       | 53 (30.11%)        | <b>0.0001</b>     |
| Prior stroke [n (%)]              | 11 (2.08%)        | 23 (13.07%)        | <b>&lt;0.0001</b> |
| Liver diseases [n (%)]            | 52 (9.83%)        | 41 (23.3%)         | <b>&lt;0.0001</b> |
| Dyslipidemia [n (%)]              | 411 (77.69%)      | 97 (55.11%)        | <b>&lt;0.0001</b> |
| COPD [n (%)]                      | 36 (6.81%)        | 9 (5.11%)          | 0.38              |
| Atrial fibrillation [n (%)]       | 149 (28.17%)      | 68 (38.64%)        | <b>0.009</b>      |
| <b>ECG findings</b>               |                   |                    |                   |
| HR [bpm]                          | 77.66 ± 17.92     | 83.6 ± 21.39       | <b>0.0003</b>     |
| LBBB [n (%)]                      | 106 (20.04%)      | 68 (38.64%)        | <b>&lt;0.0001</b> |
| <b>Echocardiographic findings</b> |                   |                    |                   |
| LVEF [%]                          | 27.24 ± 9.45      | 23.67 ± 9.49       | <b>&lt;0.0001</b> |
| LVEDd [mm]                        | 65.06 ± 8.59      | 68.42 ± 12.32      | <b>0.0007</b>     |
| IVS [mm]                          | 10.28 ± 2.1       | 9.93 ± 2.15        | <b>0.03</b>       |
| LAA [cm <sup>2</sup> ]            | 28.24 ± 7.68      | 32.15 ± 9.79       | <b>&lt;0.0001</b> |
| RAA [cm <sup>2</sup> ]            | 21.85 ± 7.11      | 25.32 ± 10.12      | <b>&lt;0.0001</b> |
| MR moderate/severe [n (%)]        | 194 (36.67%)      | 100 (56.82%)       | <b>&lt;0.0001</b> |
| TR moderate/severe [n (%)]        | 89 (16.82%)       | 74 (42.05%)        | <b>&lt;0.0001</b> |
| <b>Laboratory results</b>         |                   |                    |                   |
| Hb [g/dl]                         | 14.74 ± 1.46      | 13.39 ± 1.63       | <b>&lt;0.0001</b> |
| eGFR [ml/min/1.73m <sup>2</sup> ] | 83.68 ± 18.1      | 76.04 ± 26.8       | <b>&lt;0.0001</b> |
| NT-proBNP [pg/ml]                 | 1963.62 ± 2478.54 | 7091.83 ± 10736.67 | <b>&lt;0.0001</b> |
| Cholesterol LDL [mmol/l]          | 3.09 ± 0.96       | 2.55 ± 0.92        | <b>&lt;0.0001</b> |
| <b>HF therapy</b>                 |                   |                    |                   |
| BB [n (%)]                        | 516 (97.54%)      | 167 (94.89%)       | 0.09              |
| ACEi/ARB/ARNI [n (%)]             | 503 (95.09%)      | 131 (74.43%)       | <b>&lt;0.0001</b> |
| MRA [n (%)]                       | 461 (87.15%)      | 160 (90.91%)       | 0.21              |
| Furosemide [mg/d]                 | 25.5 ± 40.68      | 69.89 ± 83.54      | <b>&lt;0.0001</b> |
| Loop diuretics [mg/d]             | 40.62 ± 61.69     | 101.87 ± 132.92    | <b>&lt;0.0001</b> |
| CRT [n (%)]                       | 4 (0.76%)         | 18 (10.23%)        | <b>&lt;0.0001</b> |
| ICD [n (%)]                       | 41 (7.75%)        | 27 (15.34%)        | <b>0.003</b>      |
| <b>Follow-up</b>                  |                   |                    |                   |
| FU [months]                       | 47.25 ± 31.2      | 39.3 ± 30.6        | <b>0.002</b>      |
| Deaths [n (%)]                    | 44 (8.32%)        | 75 (42.61%)        | <b>&lt;0.0001</b> |

Abbreviations: see Table 1.

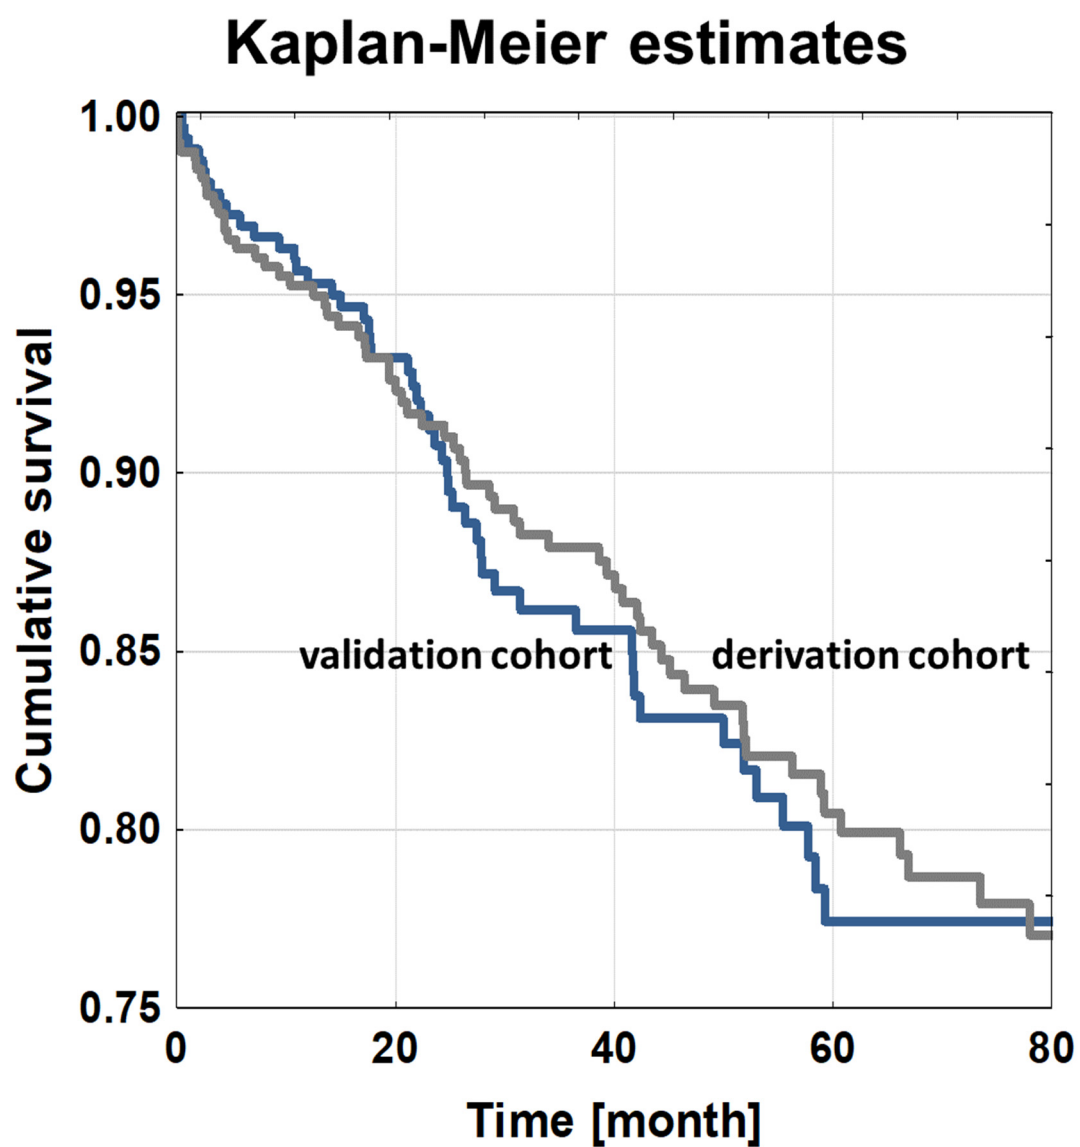

**Figure S1.** Comparison of mortality rate between derivation and validation cohorts based on Kaplan-Meier estimates.
